# Supplementary material
Source: Springer Nature journal article supplement (https://www.springermedizin.de/resource/supplementary/12913_2009_1156_MOESM2_ESM.pdf/9527882)
Supplement: MOESM2 [file 9527882]

# Incremental effectiveness

+

-

Incremental costs

+

|   | A                                                                                                                                                                                                                           | B |
|---|-----------------------------------------------------------------------------------------------------------------------------------------------------------------------------------------------------------------------------|---|
| + | Von Korff <i>et al</i> <sup>23</sup><br>Simon <i>et al</i> <sup>24</sup><br>Simon <i>et al</i> <sup>25</sup><br>Schoenbaum <i>et al</i> <sup>26</sup><br>Katon <i>et al</i> <sup>29</sup><br>Liu <i>et al</i> <sup>27</sup> |   |
| - | Araya <i>et al</i> <sup>28</sup><br>Simon <i>et al</i> <sup>30</sup>                                                                                                                                                        |   |

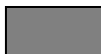

Decision strongly favoured (B= Reject treatment, C= Accept treatment)

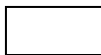

No obvious decision (Is the effect worth the costs?)
